# Supplementary material for: A hydrolysis synthesis route for (001)/(102) coexposed BiOCl nanosheets with high visible light-driven catalytic performance
Source: Royal Society of Chemistry journal article supplement (doi:10.1039/d1nj03961j), 2021-01-01
Supplement: d1nj03961j1.pdf [file d1nj03961j1.pdf]

## Hydrolysis synthesis route for (001)/(102) coexposed BiOCl nanosheets with high visible light-driven catalytic performance

Jingjing Guo<sup>a, b</sup>, Wei Zhao<sup>a, b\*</sup>, Dezhi Xiong<sup>a, b</sup>, Yao Ye<sup>a, b</sup>, Shibo, Li<sup>a, b</sup>, Bo Zhang<sup>a, b</sup>

<sup>a</sup> School of Materials Science and Engineering, Tianjin Chengjian University, Tianjin 300384, PR  
China

<sup>b</sup> Tianjin Key Laboratory of Building Green Functional Materials, Tianjin, 300384, PR China

\*Corresponding author:

zhaowei2004@tsinghua.org.cn (W. Zhao)

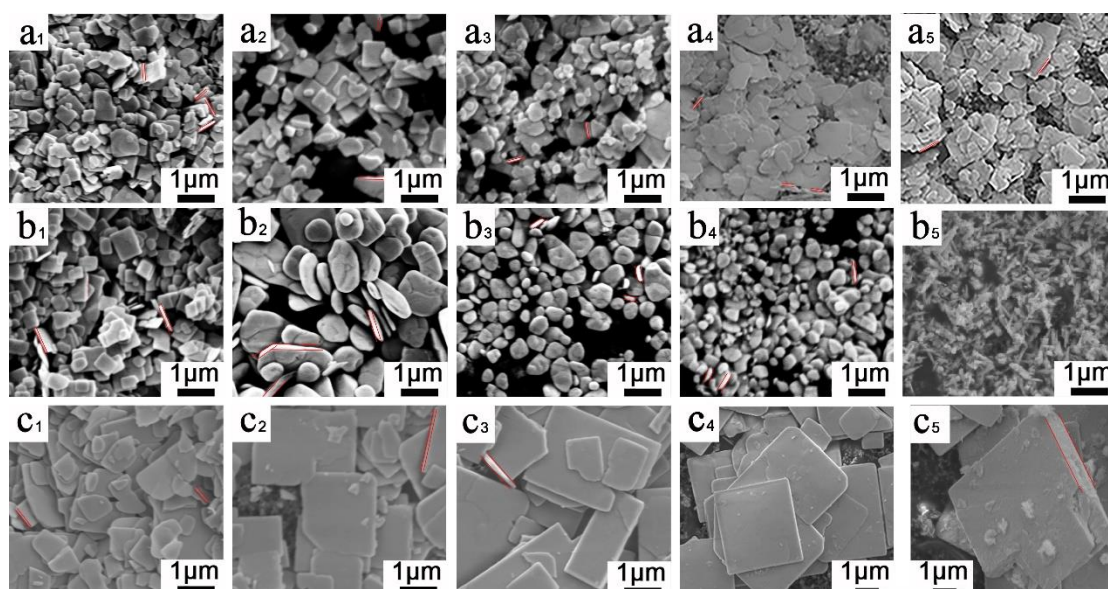

**Fig. S1** SEM images of the as-prepared BOC materials under different hydrolysis conditions, **a<sub>1</sub>-a<sub>5</sub>** deionized water content of 50 mL, 100 mL, 150 mL, 200 mL, 250 mL; **b<sub>1</sub>-b<sub>5</sub>** NaOH content of 0.2g, 0.5g, 1.0g, 1.6g, 2.0g; **c<sub>1</sub>-c<sub>5</sub>** Temperature of 40°C, 50°C, 60°C, 70°C, 80°C

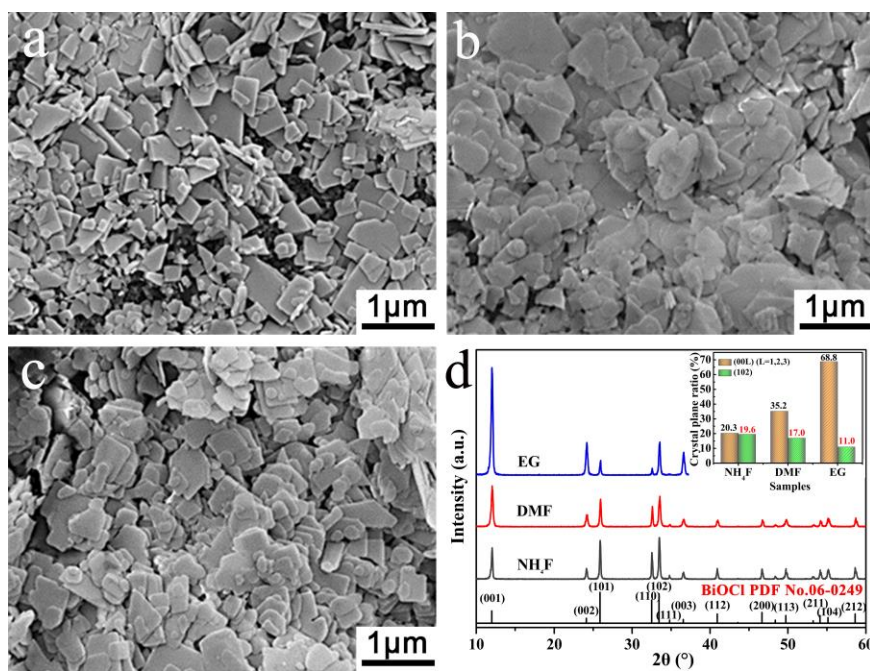

**Fig. S2** SEM images and XRD patterns of as-prepared BOC materials with different additives **a** NH<sub>4</sub>F (0.5 g); **b** DMF (5.2 mL); **c** EG (25 mL). The inset of figure d is the facet ratio of {001} and {102}

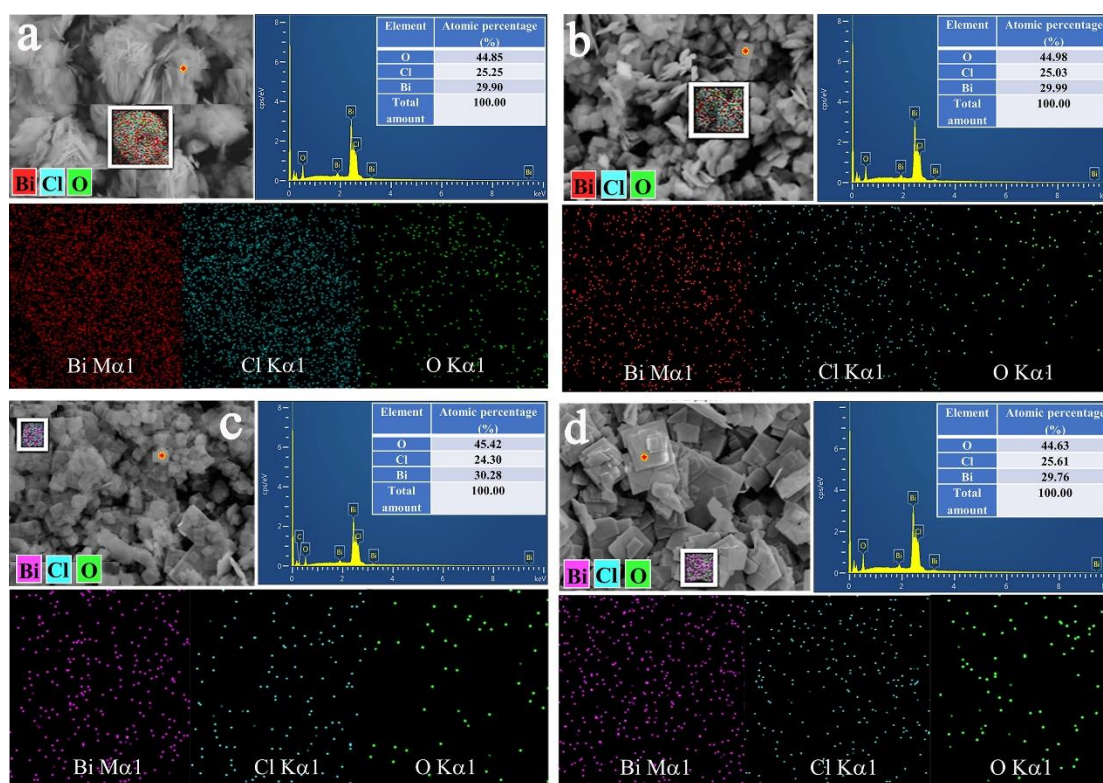

**Fig. S3** SEM images, mapping scan of EDX and elemental content of BOC crystals **a** BOC-1, **b** BOC-2, **c** BOC-3, **d** BOC-4

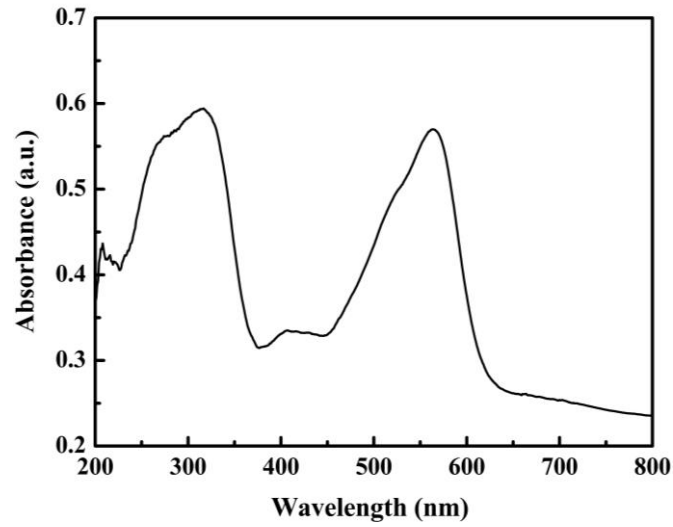

Fig. S4 UV-vis DRS of BOC-1 with the adsorption of RhB

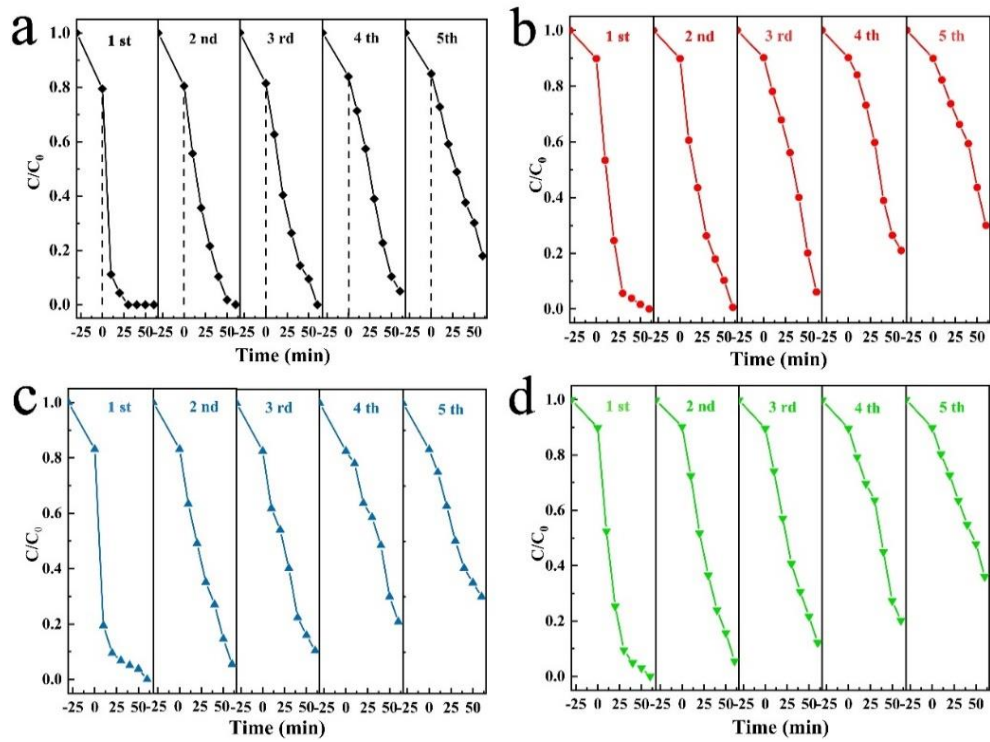

Fig. S5 Photocatalytic degradation of RhB over BOC in five cycles **a** BOC-1, **b** BOC-2, **c** BOC-3, **d** BOC-4
